# Supplementary material for: Leucine-Rich Diet Improved Muscle Function in Cachectic Walker 256 Tumour-Bearing Wistar Rats
Source: MDPI journal article supplement (doi:10.3390/cells10123272), 2021-11-23
Supplement: s1 [file s1]

# Walking test

## Max contact area (cm<sup>2</sup>)

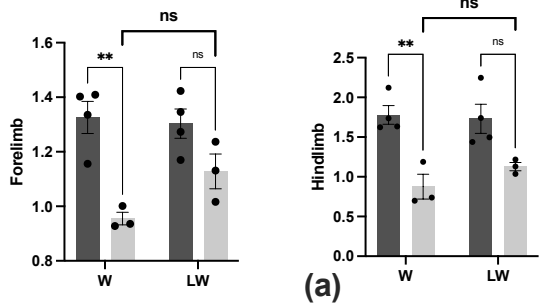

## Print area (cm<sup>2</sup>)

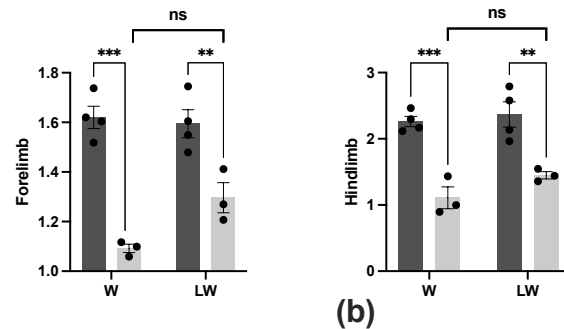

## Max intensity mean

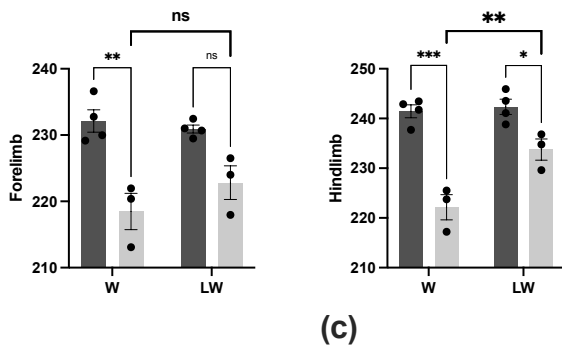

## Foot print

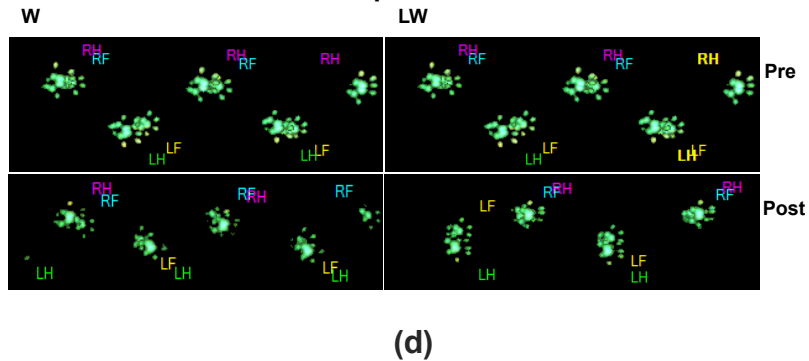

pre tumor inoculation  
post tumor inoculation
