# Supplementary material for: Leucine-Rich Diet Improved Muscle Function in Cachectic Walker 256 Tumour-Bearing Wistar Rats
Source: Cells. 2021 Nov 23;10(12):3272. doi: 10.3390/cells10123272 (PMC8699792; doi:10.3390/cells10123272)
Supplement: Supplementary file 1 [file cells-10-03272-s001.zip]

Archive with 8 entries (8 files):
- Supplementary Figure S1.pdf
- Supplementary Figure S2.pdf
- Supplementary Figure S3.pdf
- Supplementary Figure S4.pdf
- Supplementary Figure S5.pdf
- Supplementary Figure S6.pdf
- Supplementary Figure S7.pdf
- Supplementary figures legends.pdf
