# Supplementary figures and images for: Leucine-Rich Diet Improved Muscle Function in Cachectic Walker 256 Tumour-Bearing Wistar Rats
Source: MDPI journal article supplement (doi:10.3390/cells10123272), 2021-11-23

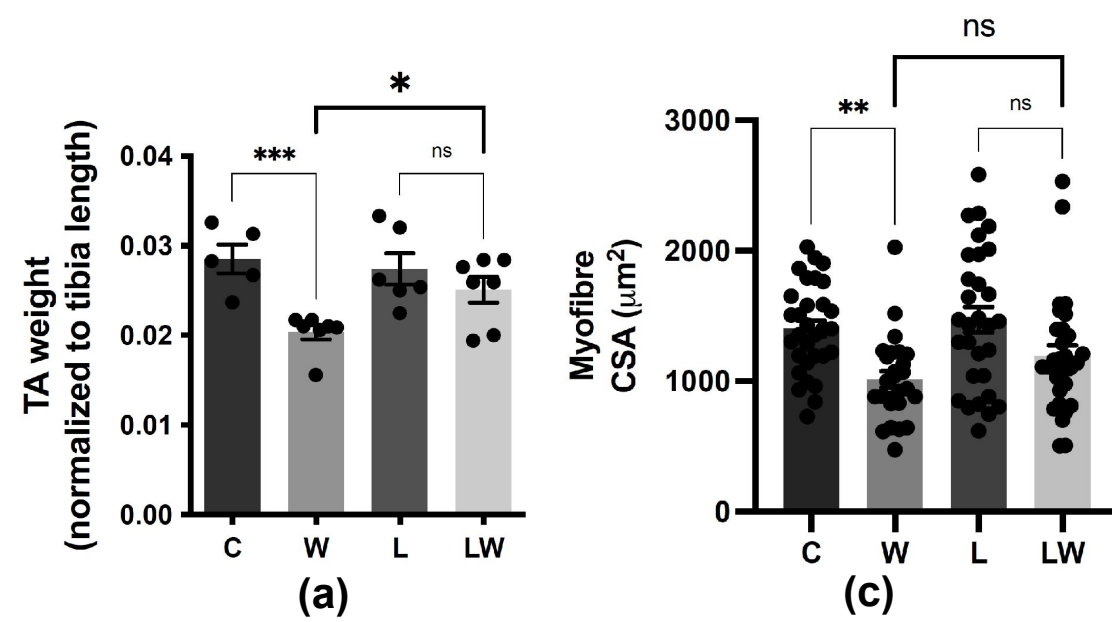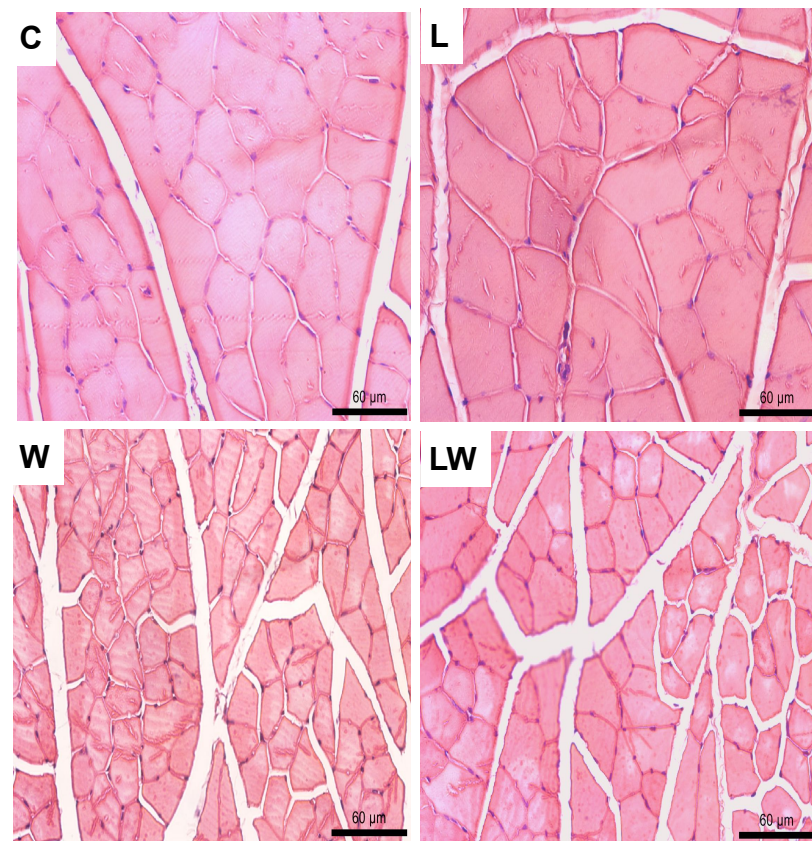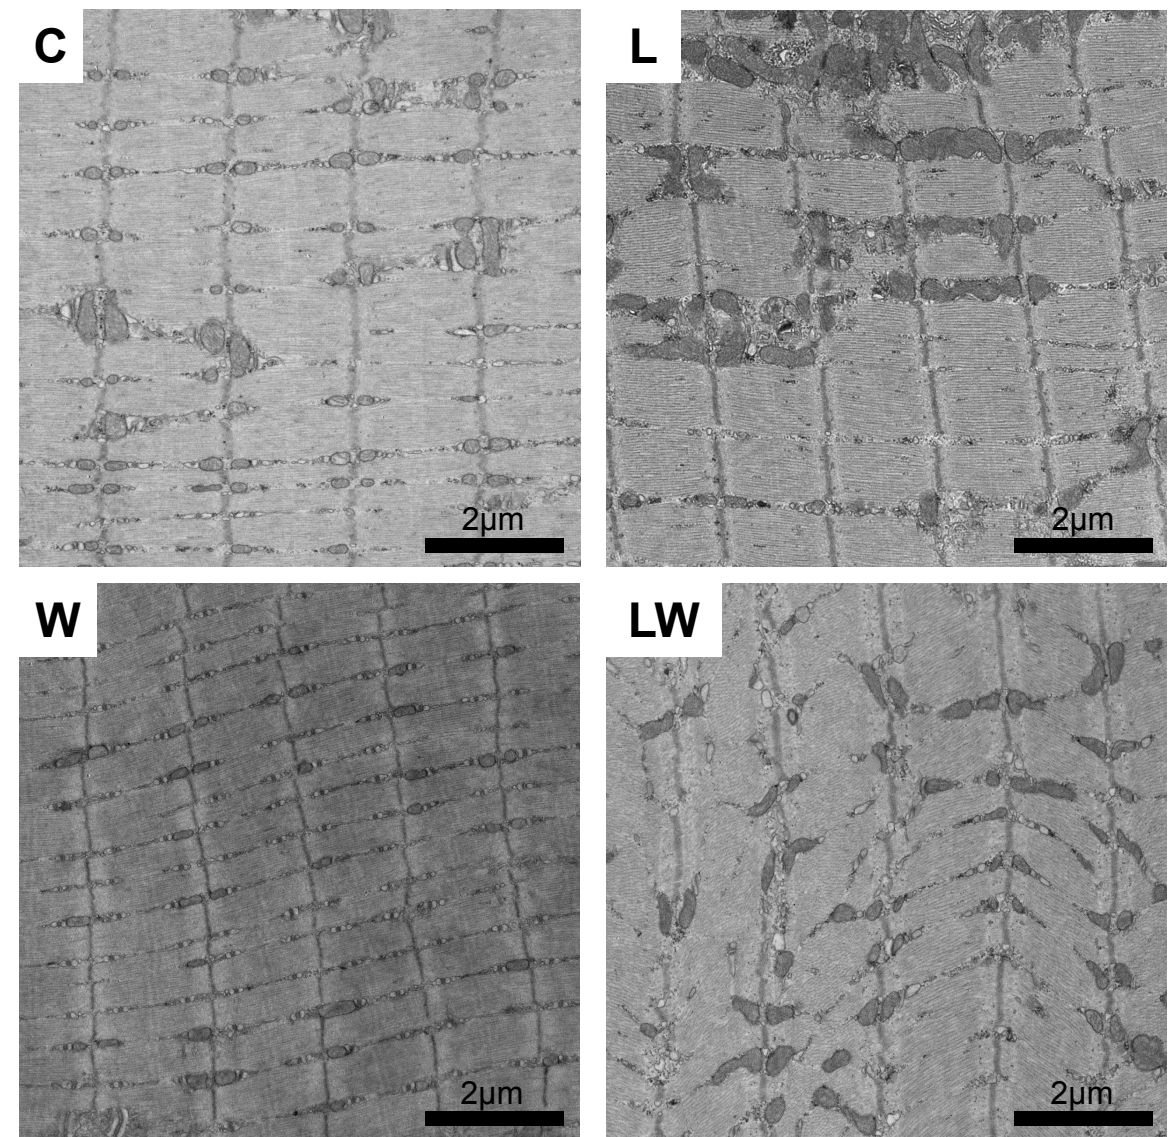

**(d)**

Supplement: s1 [file s1]

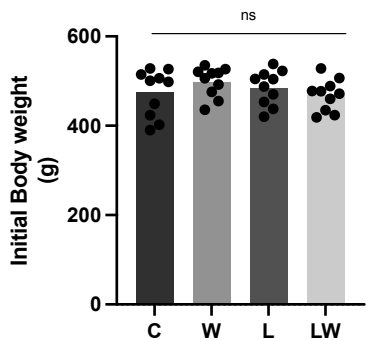

(a)

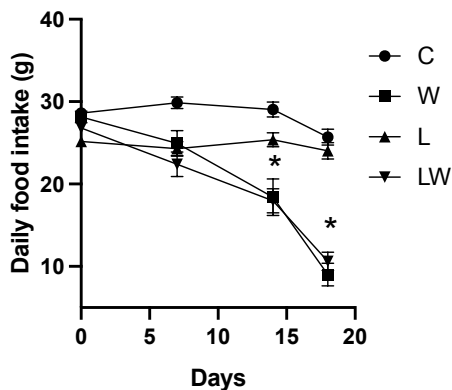

(b)

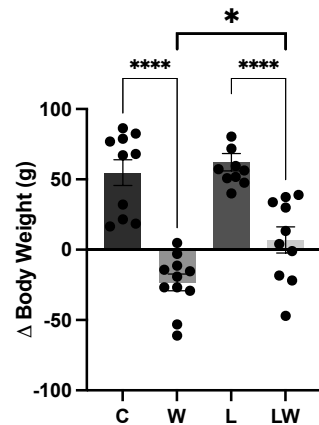

(c)

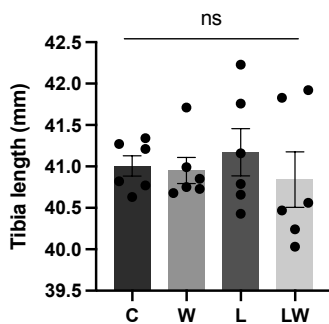

(d)

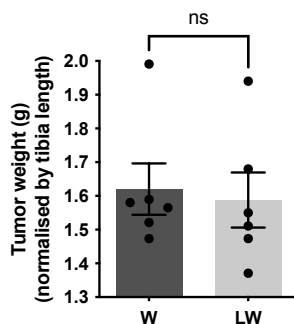

(e)

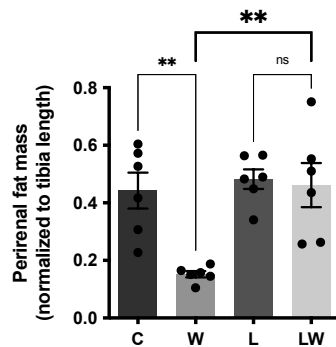

(f)

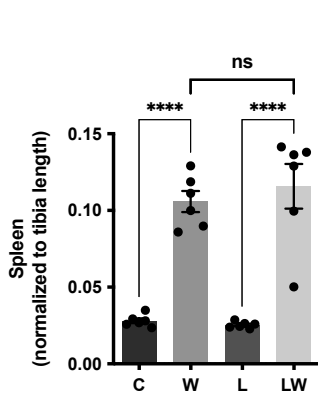

(g)

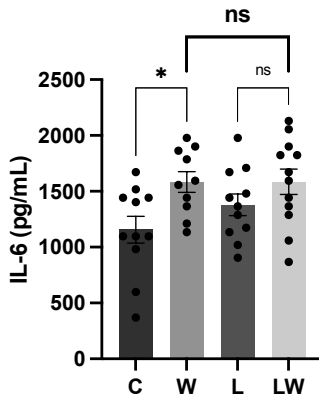

(h)

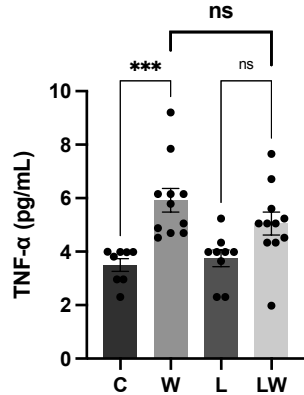

(i)

Supplement: s1 [file s1]

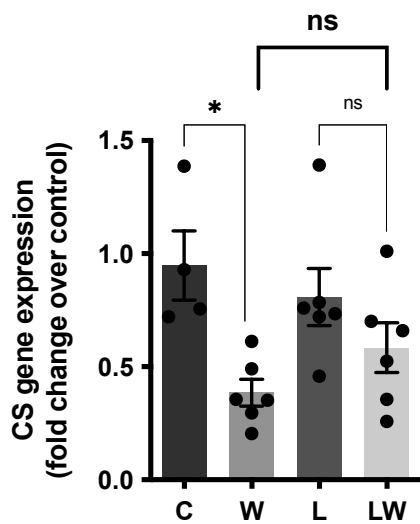

(a)

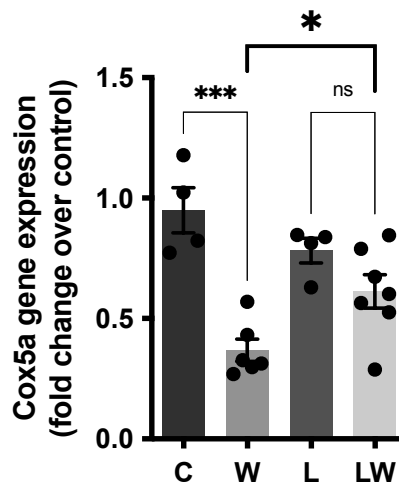

(b)

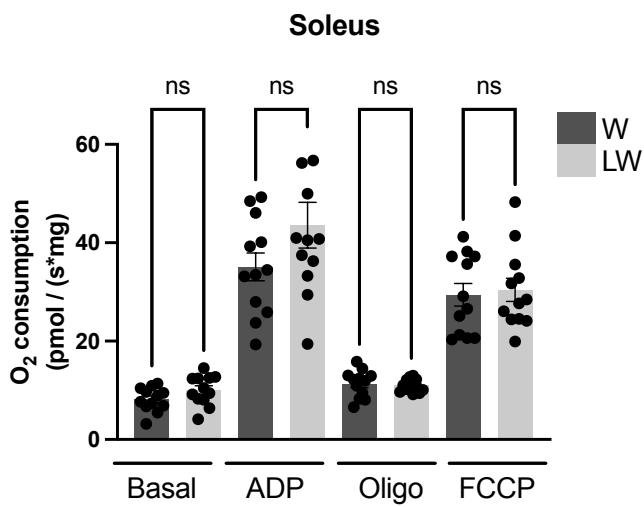

(c)

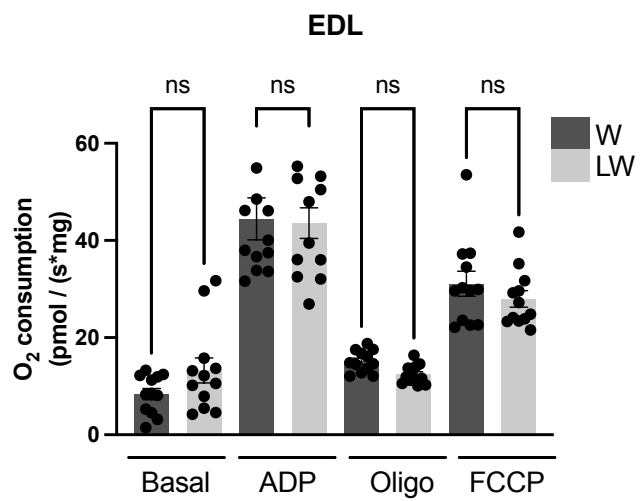

(d)

Supplement: s1 [file s1]

## Behavior test

## Strength test

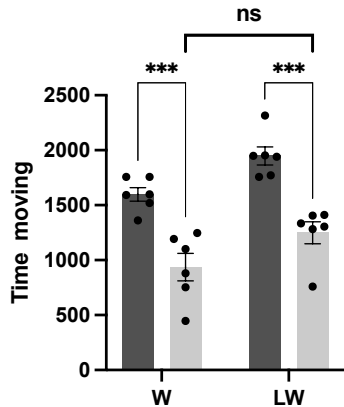

(a)

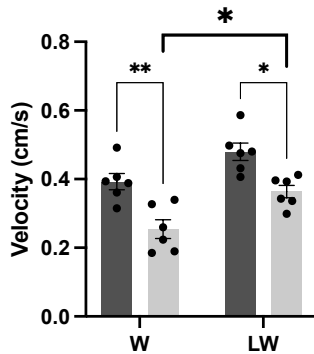

(b)

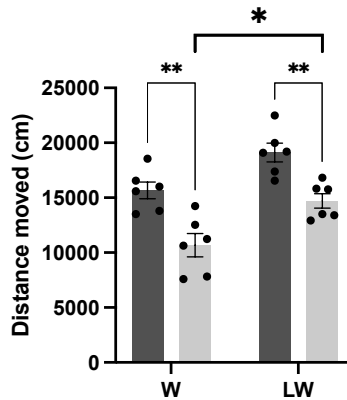

(c)

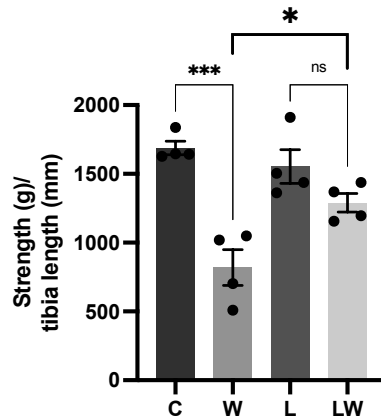

(d)

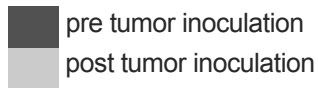

Supplement: s1 [file s1]

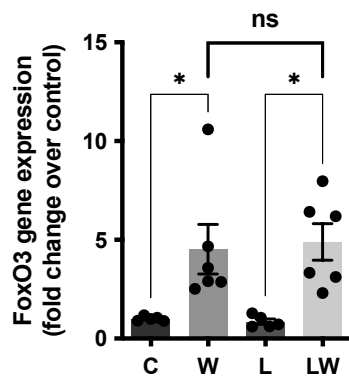

(a)

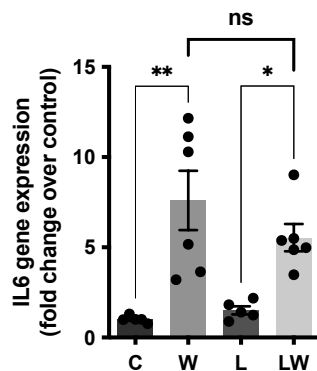

(b)

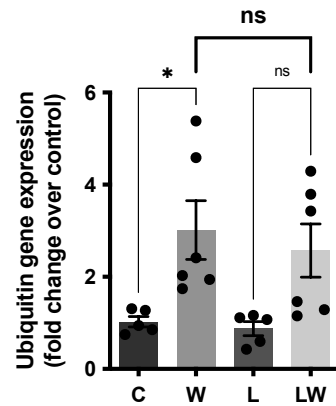

(c)

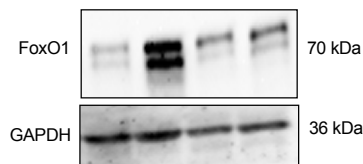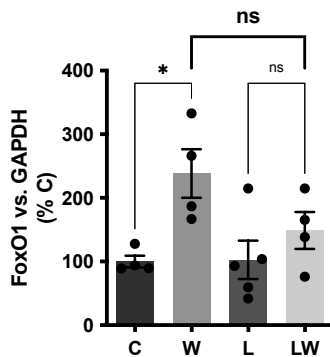

(d)

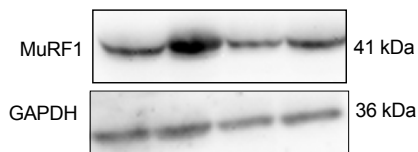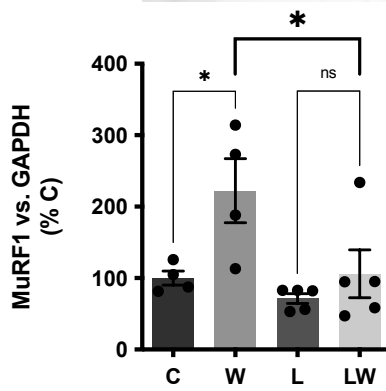

(e)

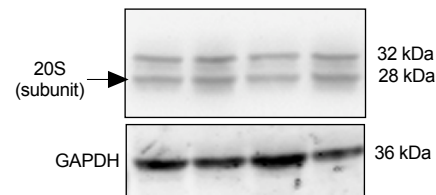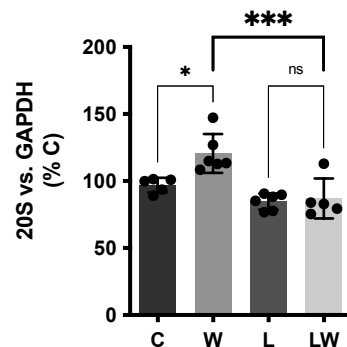

(f)

Supplement: s1 [file s1]

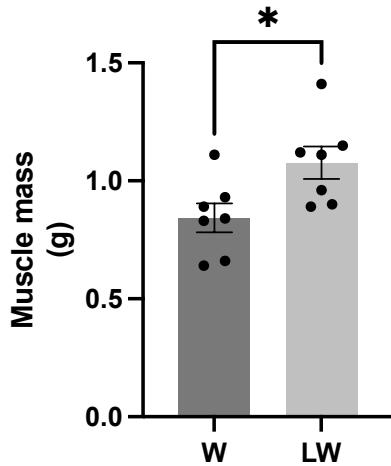

(a)

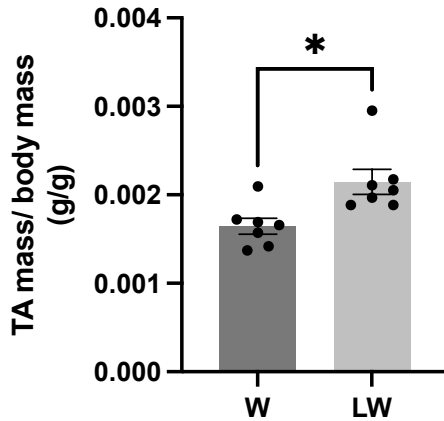

(b)

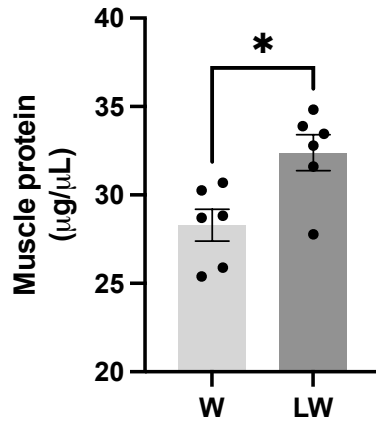

(c)

Supplement: s1 [file s1]
